# Supplementary material for: Estimation of the Exposure–Response Relation between Benzene and Acute Myeloid Leukemia by Combining Epidemiologic, Human Biomarker, and Animal Data
Source: Oxford University Press journal article supplement (doi:10.1158/1055-9965.epi-21-0287), 2021-12-13
Supplement: epi-21-0287_supplementary_figures_s1_and_s2_supps2.docx [file epi-21-0287_supplementary_figures_s1_and_s2_supps2.docx]

| 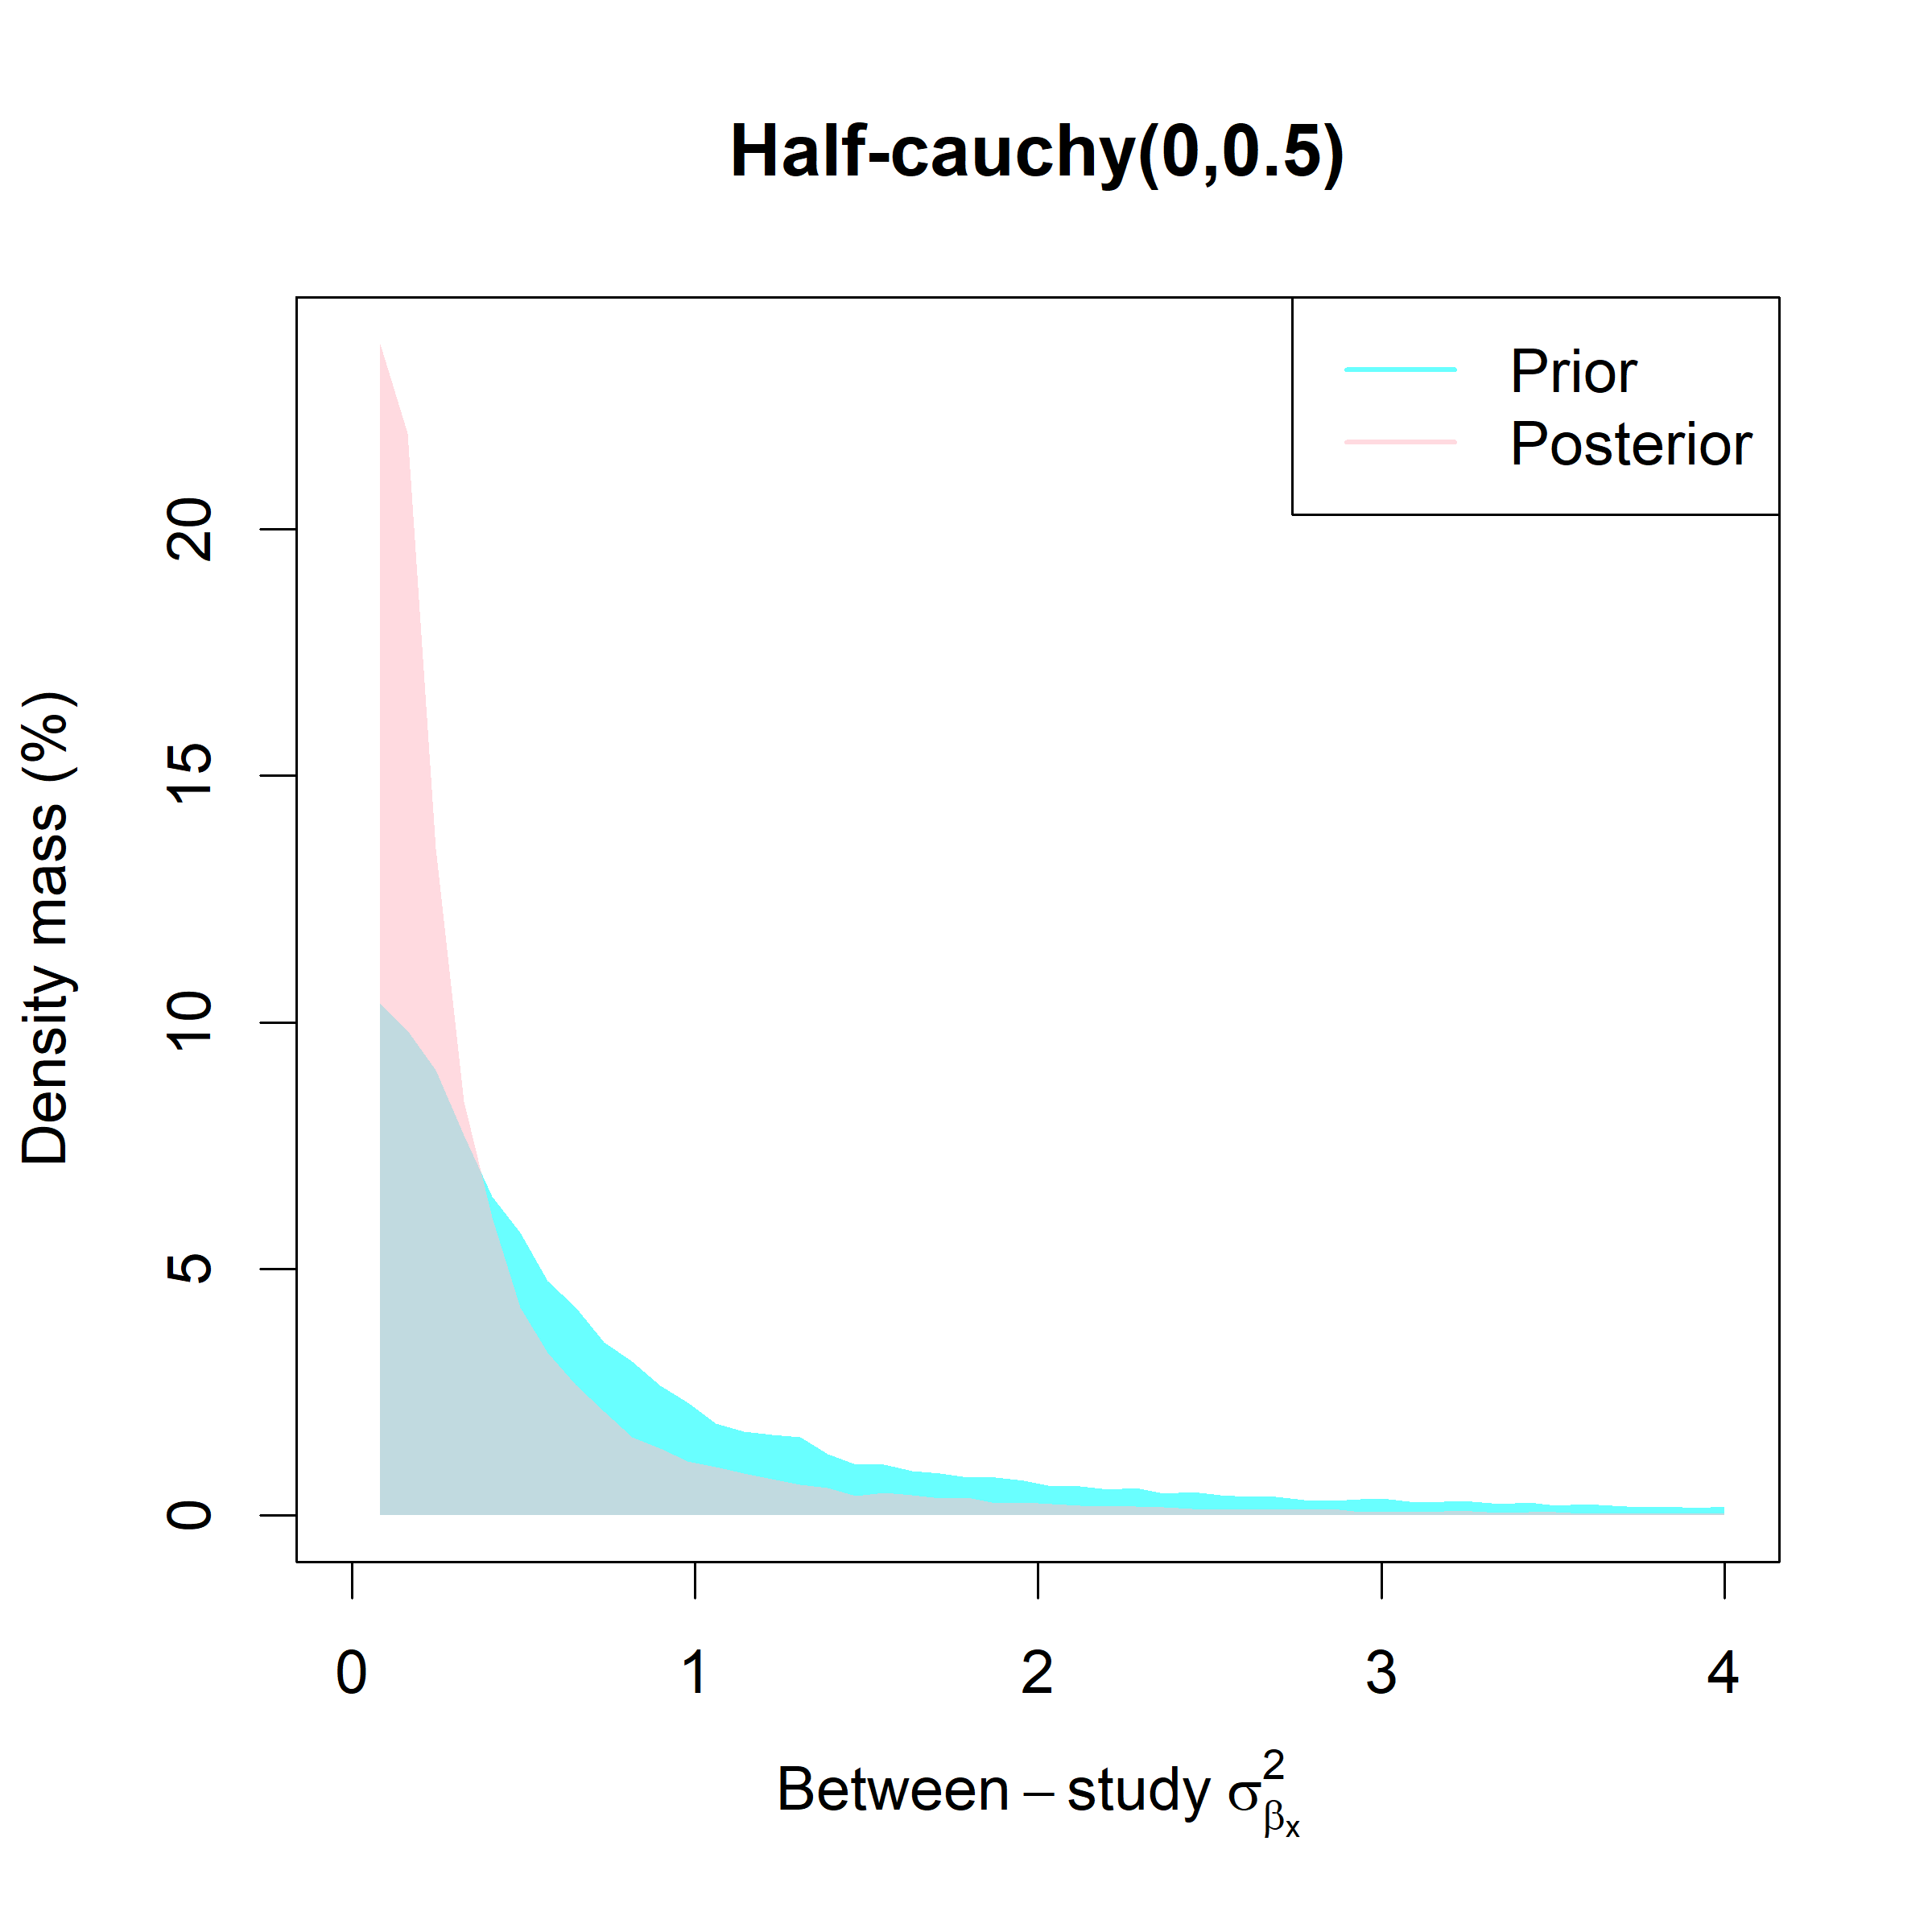 | 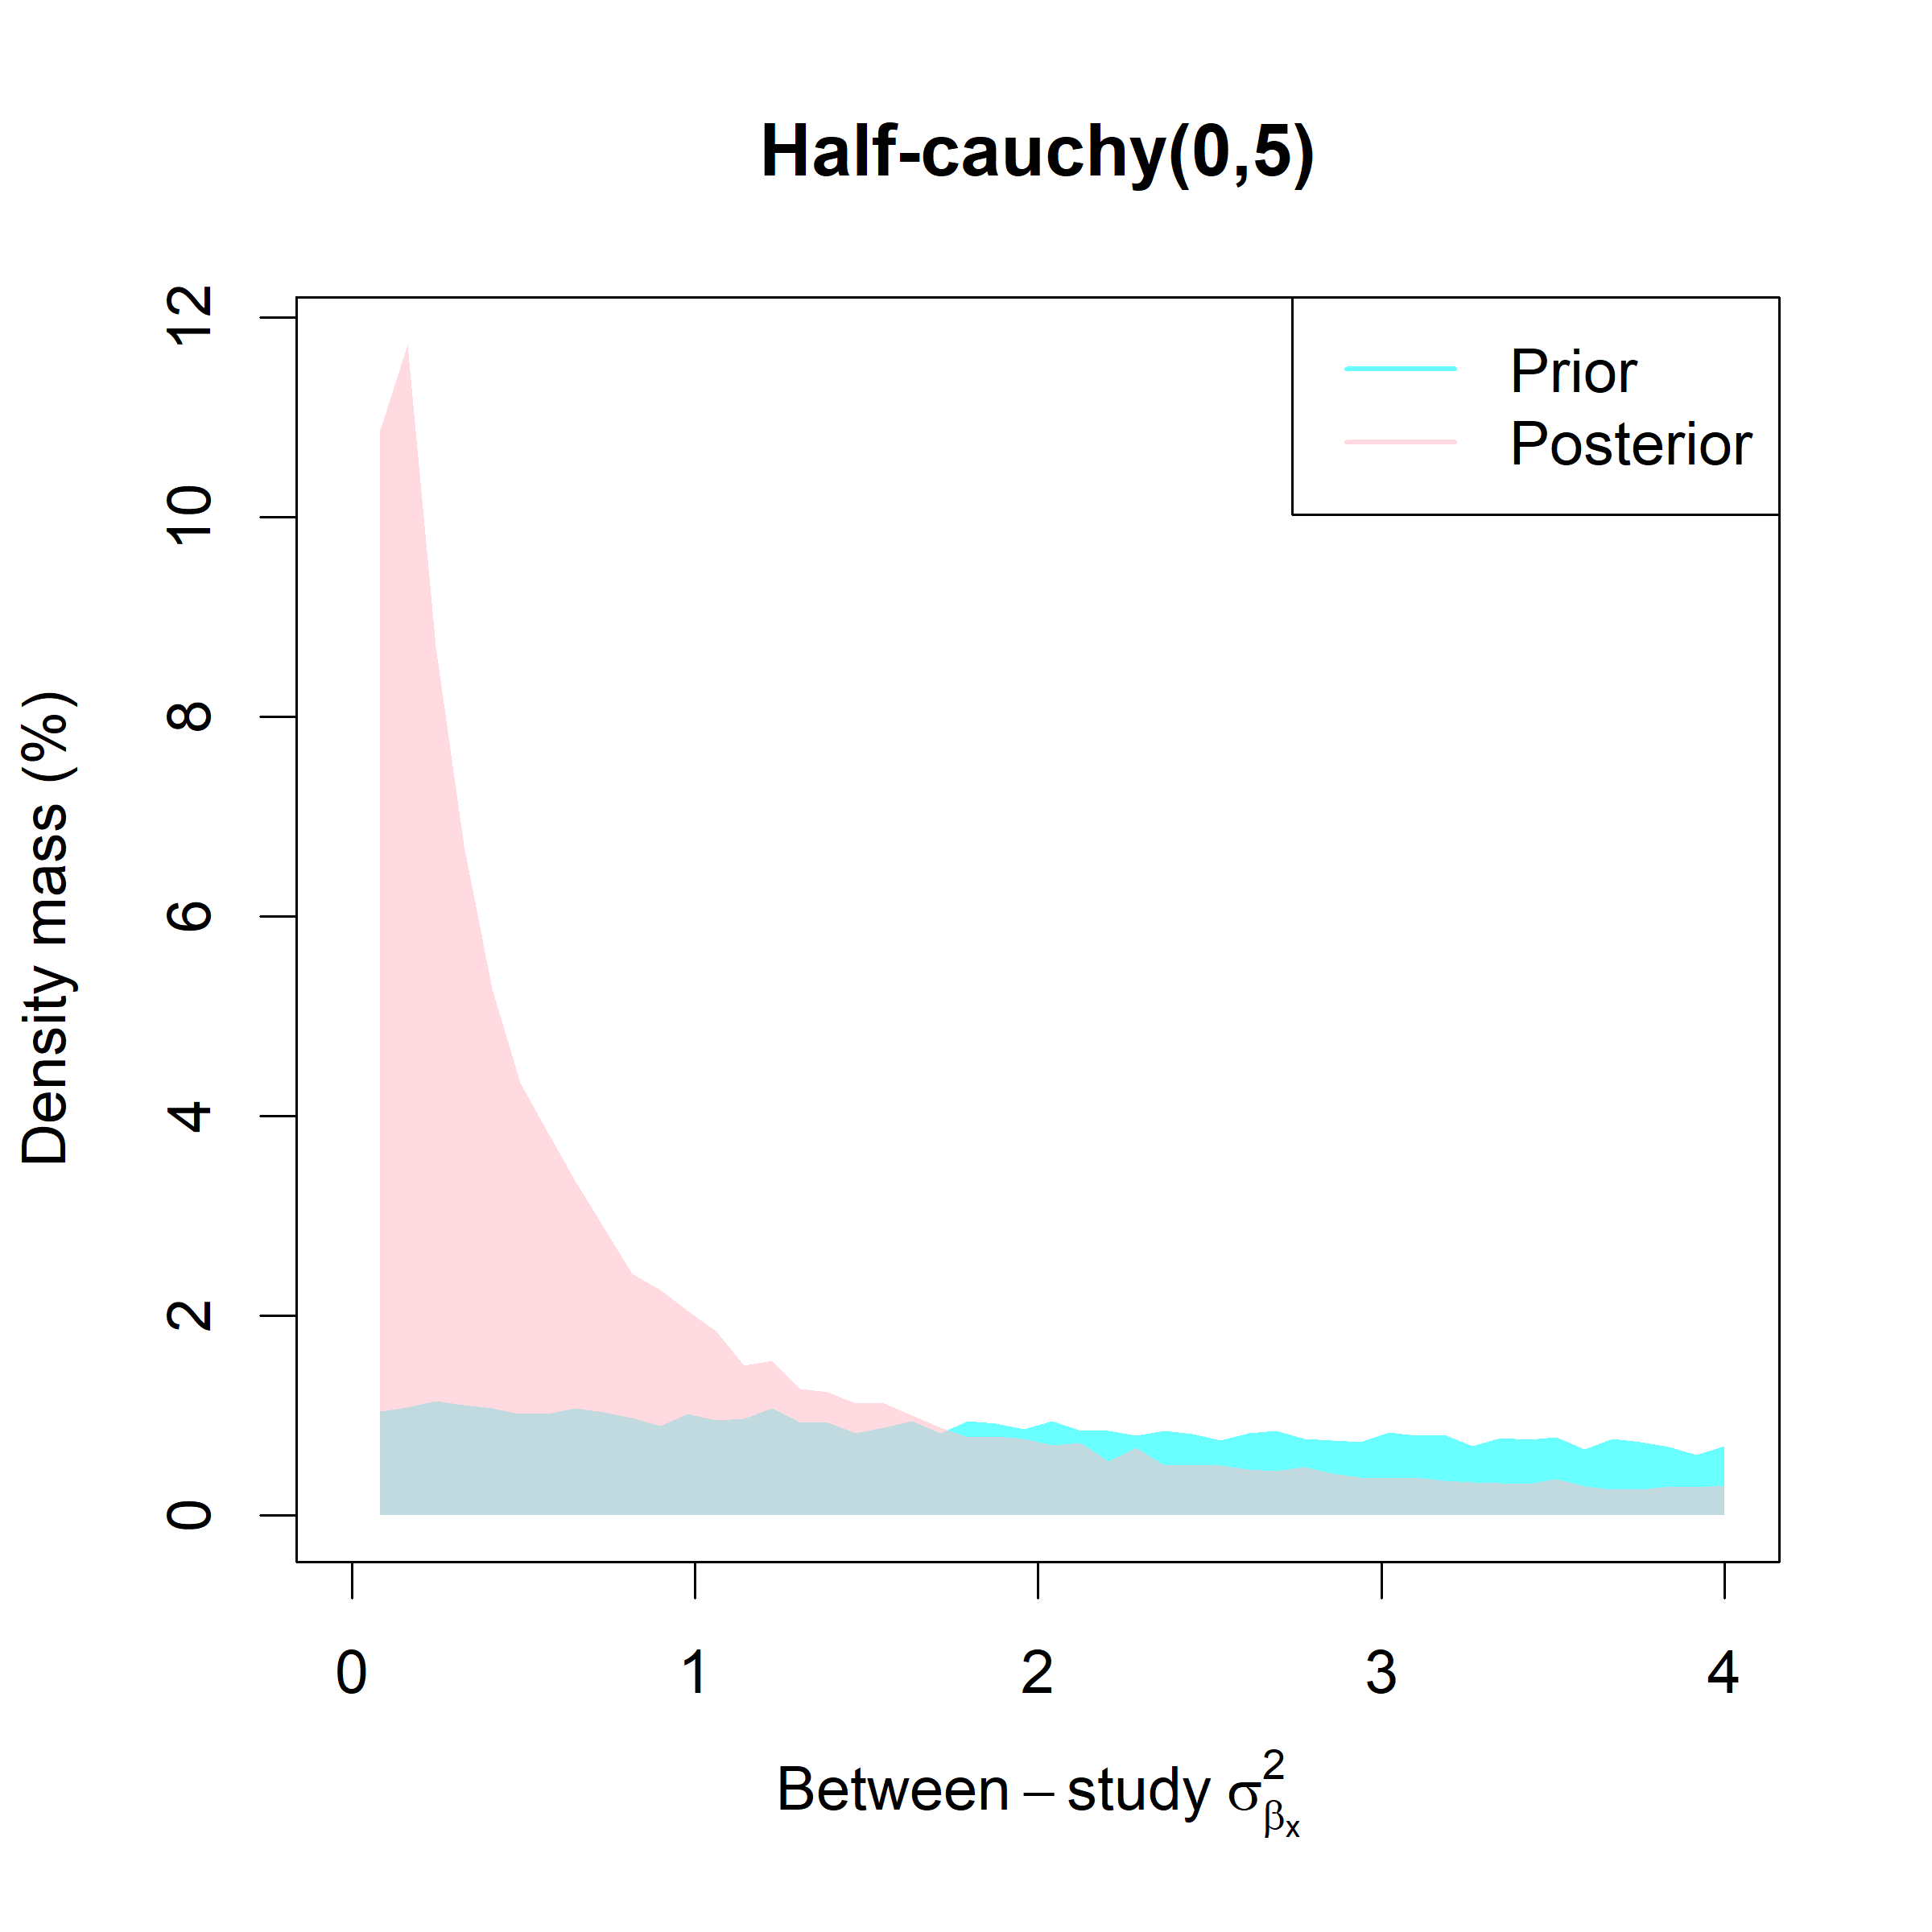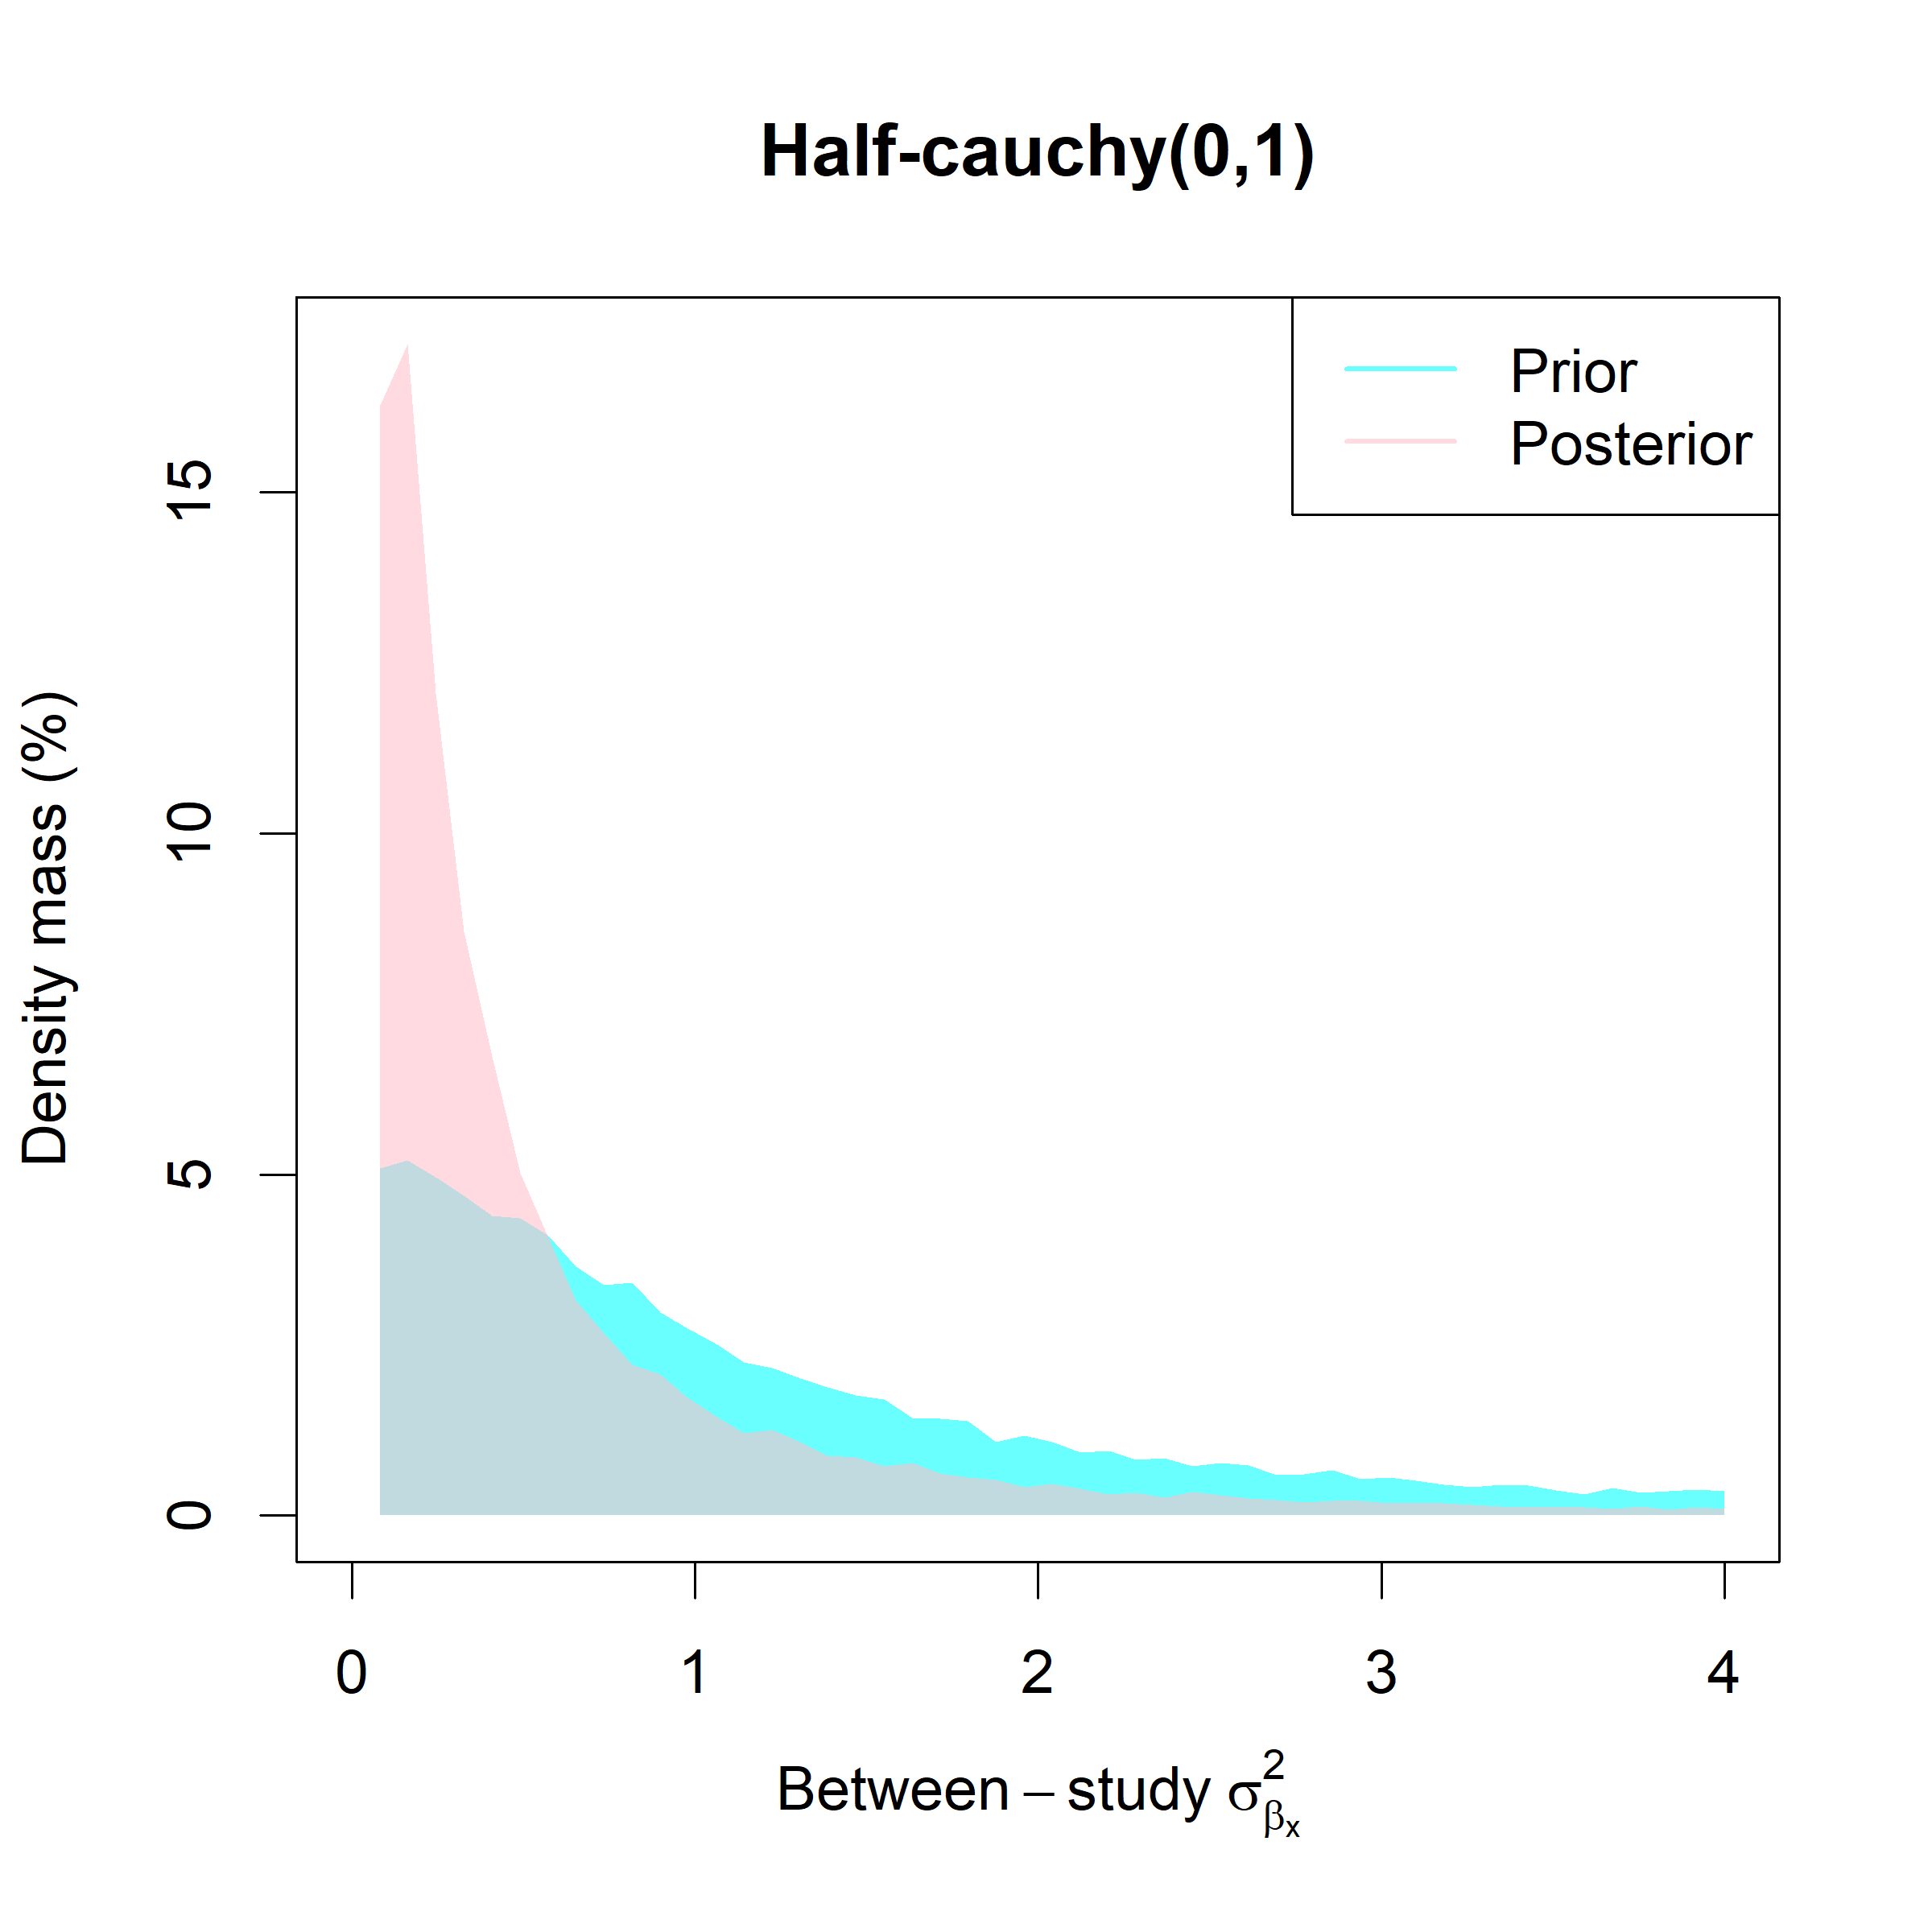 |  |
| --- | --- | --- |

Figure s1. Prior-posterior plots for the estimated between-study variation, for a linear model with intercept, fitted using only the AML data.
We see that the use of the default prior used in our analyses (i.e. a Half-Cauchy of 1) is sufficient to cover the posterior estimates. However, a value of 0.5 would have also been an option. A Half-Cauchy of 5 is virtually uninformative.


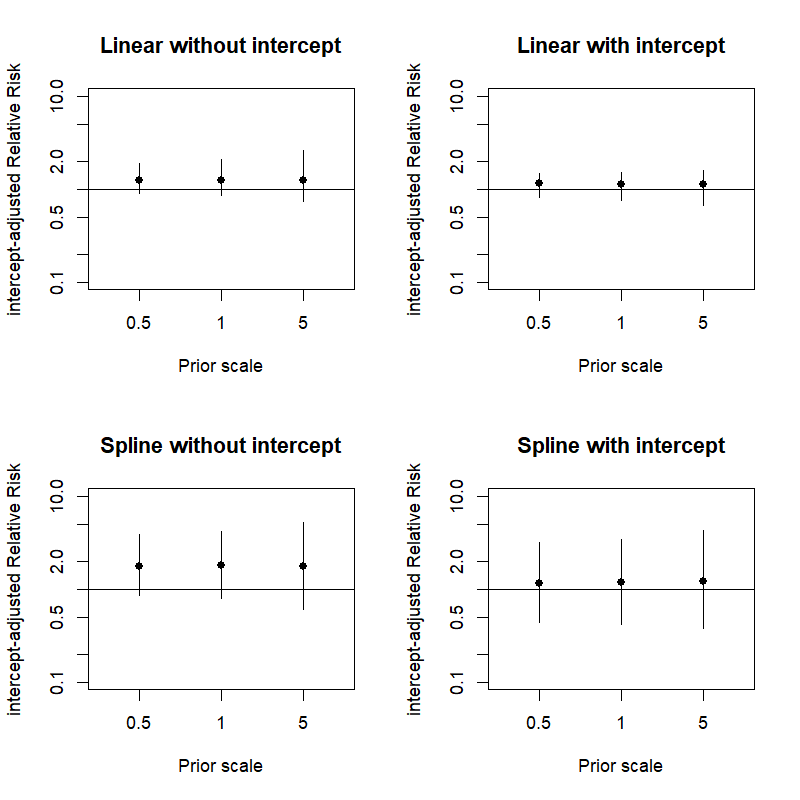


Figure S2. Estimated intercept-adjusted relative risks and 95%CI from models fitted to the AML dataset only, and using different scales for the half-Cauchy prior.
